# Supplementary material for: A novel iron complex for highly efficient catalytic hydrogen generation from the hydrolysis of organosilanes
Source: Royal Society of Chemistry journal article supplement (doi:10.1039/c4cc02852j), 2014-01-01
Supplement: c4cc02852j1.pdf [file c4cc02852j1.pdf]

## Supporting Information

### A novel iron complex for highly efficient catalytic hydrogen generation from the hydrolysis of organosilanes

Alan Kay Liang Teo and Wai Yip Fan\*

Department of Chemistry, National University of Singapore,  
3 Science Drive 3, Singapore 117543.

\*Corresponding Author: Fax: (+65) 6779-1691. E-mail: chmfanwy@nus.edu.sg.

#### List of Figures and Tables

|                                                                                                                                                       | <b>Page</b> |
|-------------------------------------------------------------------------------------------------------------------------------------------------------|-------------|
| <b>Fig. S1</b> IR Spectrum (in CH <sub>3</sub> CN) of [Fe(C <sub>6</sub> H <sub>5</sub> N <sub>2</sub> O)(CO)(MeCN) <sub>3</sub> ][PF <sub>6</sub> ]. | S3          |
| <b>Table S1</b> Comparison of the catalytic performance of the hydrolytic oxidation of triethylsilane based on iron complex and other catalysts.      | S5          |
| <b>Table S2</b> Sample and crystal data.                                                                                                              | S7          |
| <b>Table S3</b> Data collection and structure refinement.                                                                                             | S8          |
| <b>Table S4</b> Atomic coordinates and equivalent isotropic atomic displacement parameters (Å <sup>2</sup> ).                                         | S9          |
| <b>Table S5</b> Bond lengths (Å).                                                                                                                     | S10         |
| <b>Table S6</b> Bond angles (°).                                                                                                                      | S11         |
| <b>Table S7</b> Anisotropic atomic displacement parameters (Å <sup>2</sup> ).                                                                         | S12         |
| <b>Table S8</b> Hydrogen atomic coordinates and isotropic atomic displacement parameters (Å <sup>2</sup> ).                                           | S13         |
| <b>Table S9</b> Hydrogen bond distances (Å) and angles (°).                                                                                           | S13         |

## ***Experimental***

### ***General***

Syntheses were performed under nitrogen using standard Schlenk line techniques. Glassware was oven-dried for 3 hours at 150 °C prior to use. CD<sub>3</sub>CN, CDCl<sub>3</sub>, and D<sub>2</sub>O were purchased from Cambridge Isotope Laboratory Inc. All other chemicals were obtained from Aldrich, Alfa Aesar, or Comac, and were used as received. NMR (<sup>1</sup>H and <sup>13</sup>C) spectra were recorded with a Bruker AC 300 Fourier transform spectrometer at room temperature. The chemical shifts (δ) were internally referenced to the residual solvent signals relative to tetramethylsilane. IR spectra were collected with liquid samples in a cell with CaF<sub>2</sub> windows and 0.1 mm path length, with a Shimadzu IR Prestige-21 spectrometer. Elemental analyses for carbon, hydrogen, and nitrogen were performed on an Elementar Vario Micro Cube elemental analyzer while iron concentration was determined by ICP analysis using a Perkin-Elmer Dualview Optima 5300 DV ICP-OES system at the Department of Chemistry, National University of Singapore. ESI mass spectra were measured using a Finnigan LCQ spectrometer. Hydrogen gas was detected using a Balzer Prisma QMS 200 residual mass analyzer and calibrated with known concentrations of pure hydrogen gas. The organic product yields were calculated from the <sup>1</sup>H NMR spectra using reagent grade toluene or *n*-hexane as internal standard.

### ***Preparation of [Fe(C<sub>6</sub>H<sub>5</sub>N<sub>2</sub>O)(CO)(MeCN)<sub>3</sub>][PF<sub>6</sub>]***

To a completely frozen solution of triiron dodecacarbonyl (640 mg, 1.27 mmol) in dichloromethane (160 mL), iodine (968 mg, 7.62 mmol) in dichloromethane (320 mL) was added dropwise. The resulting solution was stirred for 15 minutes at room temperature. The color

of the solution turned from dark green to dark violet. 2-aminopyridine (359 mg, 3.81 mmol) was then added. Gas was evolved, and a dark green precipitate was formed over 45 minutes of stirring at room temperature. The solution was allowed to stir at room temperature for another 10 minutes until no bubbles were formed. Once the precipitation was completed, the solid was recovered with filtration and washed with hexane (80 mL). The resulting filtrate was dissolved in acetonitrile (60 mL) and left to stand for 45 minutes before silver hexafluorophosphate (964 mg, 3.81 mmol) was added and stirred for 5 minutes. Diethyl ether (100 mL) was then added to precipitate the product from the orange supernatant liquid. The product was recrystallized from slow cooling in diethyl ether to give  $[\text{Fe}(\text{C}_6\text{H}_5\text{N}_2\text{O})(\text{CO})(\text{MeCN})_3][\text{PF}_6] \cdot \frac{1}{2}(\text{Et}_2\text{O})$  as orange crystals suitable for an X-ray diffraction study (933 mg, 1.82 mmol, 48%). IR ( $\text{CH}_3\text{CN}$ ,  $\text{cm}^{-1}$ ): 2077 (s). Anal. Calcd for  $\text{C}_{13}\text{H}_{14}\text{N}_5\text{O}_2\text{FePF}_6$ : C, 33.00; H, 2.98; N, 14.80; Fe, 11.80. Found: C, 32.65; H, 2.68; N, 14.55; Fe, 11.54. ESI-MS ( $\text{CH}_3\text{OH}$ ,  $m/z$ ): 320.7  $[\text{M} - \text{PF}_6 - \text{MeCN} + \text{MeOH}]^+$ , 276.7  $[\text{M} - \text{PF}_6 - 2\text{MeCN} + \text{MeOH}]^+$ .

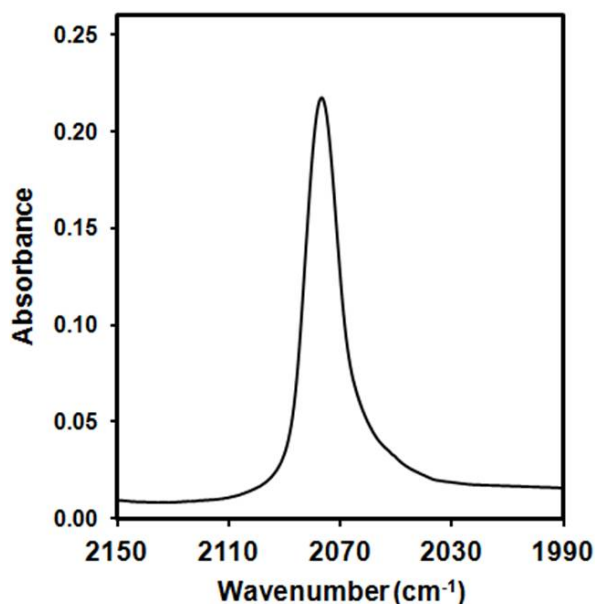

**Fig. S1** IR Spectrum (in  $\text{CH}_3\text{CN}$ ) of  $[\text{Fe}(\text{C}_6\text{H}_5\text{N}_2\text{O})(\text{CO})(\text{MeCN})_3][\text{PF}_6]$ .

### ***Typical Procedure for Catalytic Reactions***

Organosilane (2 mmol, 1 equiv) was added into a tetrahydrofuran (2 mL) solution containing the catalyst (0.2  $\mu\text{mol}$ ) and excess water (20 mmol). The reaction mixture was stirred under ambient conditions and evolution of gas was observed. Hydrogen gas was detected by sampling the headspace above the catalytic mixture throughout the reaction. A calibration curve using a known amount of pure hydrogen gas was used for the yield measurement. The yields of organosilanols were determined by  $^1\text{H}$  NMR using reagent grade toluene or *n*-hexane as internal standard.

### ***Product Identification***

The generated gas in the oxidation reaction of organosilanes was identified to be dihydrogen gas by MS. The organosilanol products were identified by NMR through the comparison of their  $^1\text{H}$  and  $^{13}\text{C}$  NMR signals with the literature data:  $\text{Et}_3\text{SiOH}$ ,<sup>1</sup> *i*- $\text{Pr}_3\text{SiOH}$ ,<sup>2</sup>  $\text{PhMe}_2\text{SiOH}$ ,<sup>3</sup>  $\text{Ph}_2\text{MeSiOH}$ ,<sup>3</sup>  $\text{Ph}_3\text{SiOH}$ .<sup>1</sup>

### ***Typical Procedure for Kinetic Studies***

Triethylsilane was added into a tetrahydrofuran solution containing the catalyst and excess water. The reaction mixture was stirred under ambient conditions and the hydrogen released was measured volumetrically via the displacement of water from an inverted measuring cylinder. The reaction rate was determined by the initial rate of hydrogen evolution while the reaction orders were obtained by following the reaction rate at different concentration of reactants at  $26.3 \pm 0.3$  °C. Kinetic isotope effect was determined by the ratio of the reaction rate of triethylsilane with  $\text{H}_2\text{O}$  and  $\text{D}_2\text{O}$ . Activation parameters were calculated from the rate

constants measured at different reaction temperature. The temperature was controlled by carefully adding ice into water. The effect of acetonitrile on the rate of hydrolysis was studied by comparing the reaction rate at different concentration of acetonitrile at  $26.3 \pm 0.3$  °C.

**Table S1. Comparison of the catalytic performance of the hydrolytic oxidation of triethylsilane based on iron complex and other catalysts..**

| Catalyst                                                                                       | Solvent | Time (min) | H <sub>2</sub> (%) | Yield (%) | TON   | TOF (hr <sup>-1</sup> ) | Ref       |
|------------------------------------------------------------------------------------------------|---------|------------|--------------------|-----------|-------|-------------------------|-----------|
| [Fe(C <sub>6</sub> H <sub>5</sub> N <sub>2</sub> O)(CO)(MeCN) <sub>3</sub> ][PF <sub>6</sub> ] | THF     | 15         | 99                 | > 99      | 10000 | 40000                   | This Work |
| [IrCl(C <sub>8</sub> H <sub>12</sub> ) <sub>2</sub> ]                                          | MeCN    | 60         | -                  | 80        | 80    | 80                      | (1)       |
| [Re(O)(hoz) <sub>2</sub> ][B(C <sub>6</sub> F <sub>5</sub> ) <sub>3</sub> ]                    | MeCN    | 120        | 97                 | 92        | 88    | 44                      | (4)       |
| [RhCl(CO) <sub>2</sub> ] <sub>2</sub>                                                          | THF     | 8          | 99                 | > 99      | 500   | 3750                    | (5)       |
| [RuCl <sub>2</sub> ( <i>p</i> -cymene)] <sub>2</sub>                                           | MeCN    | 10         | -                  | 95        | 48    | 288                     | (6)       |
| Ru <sub>2</sub> (CO) <sub>4</sub> (PPh <sub>3</sub> ) <sub>2</sub> Br <sub>2</sub>             | THF     | 60         | 71                 | 60        | 1200  | 1200                    | (7)       |
| Ru <sub>2</sub> (CO) <sub>6</sub> Br <sub>2</sub>                                              | THF     | 5          | 83                 | 75        | 1500  | 18000                   | (7)       |
| Ru <sub>2</sub> (CO) <sub>6</sub> Cl <sub>4</sub>                                              | THF     | 5          | 100                | 94        | 1880  | 22560                   | (7)       |
| Carbon Nanotube–Gold Nanohybrids                                                               | THF     | 15         | -                  | 99        | 18000 | 72000                   | (8)       |
| Nanoporous Gold                                                                                | Acetone | 120        | -                  | 94        | 94    | 47                      | (9)       |

### *X-ray Diffraction Studies*

X-ray data for [Fe(C<sub>6</sub>H<sub>5</sub>N<sub>2</sub>O)(CO)(MeCN)<sub>3</sub>][PF<sub>6</sub>] were collected with a Bruker D8 VENTURE PHOTON Diffractometer, using Mo K $\alpha$  radiation at 100(2) K with the SMART suite of programs.<sup>10</sup> Data were processed and corrected for Lorentz and polarization effects with SAINT<sup>11</sup> and for absorption effects with SADABS.<sup>12</sup> Structural solution and refinement were carried out with the SHELXTL suite of programs.<sup>13</sup> The structures were solved by direct methods to locate the heavy atoms, followed by difference maps for the light, non-hydrogen

atoms. All hydrogen atoms were placed in calculated positions. All non-hydrogen atoms were generally given anisotropic displacement parameters in the final model. The crystal structure report and a summary of the most important crystallographic data are provided in this Supporting Information.

### ***Crystal Structure Report***

A orange needle-like specimen of  $C_{15}H_{19}F_6FeN_5O_{2.50}P$ , approximate dimensions 0.048 mm  $\times$  0.066 mm  $\times$  0.178 mm, was used for the X-ray crystallographic analysis. The X-ray intensity data were measured.

The total exposure time was 6.46 hours. The frames were integrated with the Bruker SAINT software package using a narrow-frame algorithm. The integration of the data using a monoclinic unit cell yielded a total of 40849 reflections to a maximum  $\theta$  angle of  $27.50^\circ$  ( $0.77 \text{ \AA}$  resolution), of which 4849 were independent (average redundancy 8.424, completeness = 100.0%,  $R_{\text{int}} = 17.01\%$ ,  $R_{\text{sig}} = 10.76\%$ ) and 2923 (60.28%) were greater than  $2\sigma(F^2)$ . The final cell constants of  $a = 14.3610(14) \text{ \AA}$ ,  $b = 8.1428(7) \text{ \AA}$ ,  $c = 18.0294(17) \text{ \AA}$ ,  $\beta = 91.916(3)^\circ$ , volume =  $2107.2(3) \text{ \AA}^3$ , are based upon the refinement of the XYZ-centroids of 294 reflections above  $20 \sigma(I)$  with  $5.235^\circ < 2\theta < 33.98^\circ$ . Data were corrected for absorption effects using the multi-scan method (SADABS). The ratio of minimum to maximum apparent transmission was 0.872. The calculated minimum and maximum transmission coefficients (based on crystal size) are 0.8610 and 0.9600.

The structure was solved and refined using the Bruker SHELXTL Software Package, using the space group  $P 1 2_1/c 1$ , with  $Z = 4$  for the formula unit,  $C_{15}H_{19}F_6FeN_5O_{2.50}P$ . The final anisotropic full-matrix least-squares refinement on  $F^2$  with 293 variables converged at  $R1$

= 7.30%, for the observed data and  $wR2 = 16.32\%$  for all data. The goodness-of-fit was 1.060. The largest peak in the final difference electron density synthesis was  $1.064 \text{ e}/\text{\AA}^3$  and the largest hole was  $-1.497 \text{ e}/\text{\AA}^3$  with an RMS deviation of  $0.121 \text{ e}/\text{\AA}^3$ . On the basis of the final model, the calculated density was  $1.608 \text{ g}/\text{cm}^3$  and  $F(000)$ , 1036  $e^-$ .

**Table S2. Sample and crystal data.**

|                        |                                                                           |                           |
|------------------------|---------------------------------------------------------------------------|---------------------------|
| Chemical formula       | $\text{C}_{15}\text{H}_{19}\text{F}_6\text{FeN}_5\text{O}_{2.50}\text{P}$ |                           |
| Formula weight         | 510.17                                                                    |                           |
| Temperature            | 100(2) K                                                                  |                           |
| Wavelength             | 0.71073 $\text{\AA}$                                                      |                           |
| Crystal size           | $0.048 \times 0.066 \times 0.178 \text{ mm}$                              |                           |
| Crystal habit          | orange needle                                                             |                           |
| Crystal system         | monoclinic                                                                |                           |
| Space group            | P 1 21/c 1                                                                |                           |
| Unit cell dimensions   | $a = 14.3610(14) \text{ \AA}$                                             | $\alpha = 90^\circ$       |
|                        | $b = 8.1428(7) \text{ \AA}$                                               | $\beta = 91.916(3)^\circ$ |
|                        | $c = 18.0294(17) \text{ \AA}$                                             | $\gamma = 90^\circ$       |
| Volume                 | $2107.2(3) \text{ \AA}^3$                                                 |                           |
| Z                      | 4                                                                         |                           |
| Density (calculated)   | $1.608 \text{ g}/\text{cm}^3$                                             |                           |
| Absorption coefficient | $0.868 \text{ mm}^{-1}$                                                   |                           |
| $F(000)$               | 1036                                                                      |                           |

**Table S3. Data collection and structure refinement.**

|                                                           |                                                                            |                              |
|-----------------------------------------------------------|----------------------------------------------------------------------------|------------------------------|
| Theta range for data collection                           | 2.63 to 27.50°                                                             |                              |
| Index ranges                                              | -18<=h<=18, -10<=k<=10, -23<=l<=23                                         |                              |
| Reflections collected                                     | 40849                                                                      |                              |
| Independent reflections                                   | 4849 [R(int) = 0.1701]                                                     |                              |
| Coverage of independent reflections                       | 100.0%                                                                     |                              |
| Absorption correction                                     | multi-scan                                                                 |                              |
| Max. and min. transmission                                | 0.9600 and 0.8610                                                          |                              |
| Structure solution technique                              | direct methods                                                             |                              |
| Structure solution program                                | SHELXS-97 (Sheldrick 2008)                                                 |                              |
| Refinement method                                         | Full-matrix least-squares on F <sup>2</sup>                                |                              |
| Refinement program                                        | SHELXL-2013 (Sheldrick, 2013)                                              |                              |
| Function minimized                                        | $\Sigma w(F_o^2 - F_c^2)^2$                                                |                              |
| Data / restraints / parameters                            | 4849 / 35 / 293                                                            |                              |
| Goodness-of-fit on F <sup>2</sup>                         | 1.060                                                                      |                              |
| $\Delta/\sigma_{\max}$                                    | 0.001                                                                      |                              |
| Final R indices                                           | 2923 data; I>2 $\sigma$ (I)                                                | R1 = 0.0730,<br>wR2 = 0.1435 |
|                                                           | all data                                                                   | R1 = 0.1450,<br>wR2 = 0.1632 |
| Weighting scheme                                          | $w=1/[\sigma^2(F_o^2)+(0.0429P)^2+10.3187P]$<br>where $P=(F_o^2+2F_c^2)/3$ |                              |
| Largest diff. peak and hole<br>R.M.S. deviation from mean | 1.064 and -1.497 eÅ <sup>-3</sup><br>0.121 eÅ <sup>-3</sup>                |                              |



**Table S4. Atomic coordinates and equivalent isotropic atomic displacement parameters ( $\text{\AA}^2$ ).  $U(\text{eq})$  is defined as one third of the trace of the orthogonalized  $U_{ij}$  tensor.**

|     | x/a        | y/b         | z/c         | $U(\text{eq})$ |
|-----|------------|-------------|-------------|----------------|
| Fe1 | 0.20225(5) | 0.08252(9)  | 0.72481(4)  | 0.0163(2)      |
| P1  | 0.40260(9) | 0.74010(17) | 0.92158(8)  | 0.0229(3)      |
| F1  | 0.3539(3)  | 0.6206(4)   | 0.9778(2)   | 0.0514(11)     |
| F2  | 0.4520(2)  | 0.8343(5)   | 0.9889(2)   | 0.0487(10)     |
| F3  | 0.4508(2)  | 0.8613(5)   | 0.8654(2)   | 0.0504(10)     |
| F4  | 0.3537(2)  | 0.6450(5)   | 0.8535(2)   | 0.0506(10)     |
| F5  | 0.4900(2)  | 0.6189(4)   | 0.91775(19) | 0.0401(9)      |
| F6  | 0.3148(2)  | 0.8612(4)   | 0.92599(19) | 0.0356(8)      |
| O1  | 0.0172(2)  | 0.1506(4)   | 0.77385(19) | 0.0219(8)      |
| O2  | 0.1050(3)  | 0.9522(5)   | 0.5940(2)   | 0.0480(12)     |
| N1  | 0.2344(3)  | 0.2880(5)   | 0.6745(2)   | 0.0154(9)      |
| N2  | 0.0900(3)  | 0.3552(5)   | 0.7140(2)   | 0.0188(10)     |
| N3  | 0.3262(3)  | 0.9734(5)   | 0.7070(2)   | 0.0230(10)     |
| N4  | 0.2609(3)  | 0.1754(5)   | 0.8164(2)   | 0.0211(10)     |
| N5  | 0.1668(3)  | 0.8971(6)   | 0.7844(2)   | 0.0243(10)     |
| C1  | 0.3144(3)  | 0.3260(7)   | 0.6404(3)   | 0.0215(12)     |
| C2  | 0.3284(4)  | 0.4750(6)   | 0.6089(3)   | 0.0221(12)     |
| C3  | 0.2590(4)  | 0.5929(7)   | 0.6108(3)   | 0.0250(12)     |
| C4  | 0.1775(4)  | 0.5581(6)   | 0.6461(3)   | 0.0221(12)     |
| C5  | 0.1678(3)  | 0.4027(6)   | 0.6773(3)   | 0.0163(10)     |
| C6  | 0.0874(3)  | 0.1964(6)   | 0.7430(3)   | 0.0158(10)     |
| C7  | 0.1456(4)  | 0.0021(7)   | 0.6446(3)   | 0.0261(13)     |
| C8  | 0.3933(4)  | 0.9021(7)   | 0.7016(3)   | 0.0261(12)     |
| C9  | 0.4786(4)  | 0.8071(9)   | 0.6931(4)   | 0.0508(11)     |
| C10 | 0.2989(4)  | 0.2082(7)   | 0.8705(3)   | 0.0230(12)     |
| C11 | 0.3475(5)  | 0.2417(9)   | 0.9411(4)   | 0.0508(11)     |
| C12 | 0.1494(4)  | 0.7941(8)   | 0.8224(3)   | 0.0320(15)     |
| C13 | 0.1299(5)  | 0.6588(9)   | 0.8736(4)   | 0.0508(11)     |
| O1S | 0.9898(7)  | 0.9629(8)   | 0.9941(6)   | 0.032(2)       |
| C1S | 0.8954(10) | 0.7333(15)  | 0.0235(8)   | 0.042(4)       |
| C2S | 0.9163(8)  | 0.9116(15)  | 0.0424(6)   | 0.032(3)       |
| C3S | 0.0106(9)  | 0.1357(10)  | 0.0082(7)   | 0.037(3)       |
| C4S | 0.0938(9)  | 0.178(2)    | 0.9630(8)   | 0.041(4)       |

**Table S5. Bond lengths (Å).**

|         |          |         |          |
|---------|----------|---------|----------|
| Fe1-C7  | 1.761(6) | Fe1-C6  | 1.930(5) |
| Fe1-N5  | 1.931(5) | Fe1-N1  | 1.966(4) |
| Fe1-N4  | 1.979(5) | Fe1-N3  | 2.025(4) |
| P1-F2   | 1.583(3) | P1-F1   | 1.585(4) |
| P1-F3   | 1.590(4) | P1-F4   | 1.594(4) |
| P1-F5   | 1.600(3) | P1-F6   | 1.604(3) |
| O1-C6   | 1.225(6) | O2-C7   | 1.141(6) |
| N1-C5   | 1.339(6) | N1-C1   | 1.358(6) |
| N2-C5   | 1.373(6) | N2-C6   | 1.396(6) |
| N3-C8   | 1.131(6) | N4-C10  | 1.133(6) |
| N5-C12  | 1.117(7) | C1-C2   | 1.357(7) |
| C2-C3   | 1.384(7) | C3-C4   | 1.380(7) |
| C4-C5   | 1.394(7) | C8-C9   | 1.461(8) |
| C10-C11 | 1.457(8) | C12-C13 | 1.471(8) |
| O1S-C2S | 1.453(8) | O1S-C3S | 1.458(9) |
| C1S-C2S | 1.519(9) | C3S-C4S | 1.507(9) |

**Table S6. Bond angles (°).**

|             |           |             |            |
|-------------|-----------|-------------|------------|
| C7-Fe1-C6   | 86.8(2)   | C7-Fe1-N5   | 92.4(2)    |
| C6-Fe1-N5   | 92.21(19) | C7-Fe1-N1   | 92.7(2)    |
| C6-Fe1-N1   | 83.37(18) | N5-Fe1-N1   | 173.05(18) |
| C7-Fe1-N4   | 177.6(2)  | C6-Fe1-N4   | 90.98(19)  |
| N5-Fe1-N4   | 87.00(18) | N1-Fe1-N4   | 87.71(17)  |
| C7-Fe1-N3   | 95.2(2)   | C6-Fe1-N3   | 177.18(19) |
| N5-Fe1-N3   | 89.70(17) | N1-Fe1-N3   | 94.53(17)  |
| N4-Fe1-N3   | 87.05(17) | F2-P1-F1    | 90.2(2)    |
| F2-P1-F3    | 89.7(2)   | F1-P1-F3    | 179.4(2)   |
| F2-P1-F4    | 179.5(2)  | F1-P1-F4    | 90.1(2)    |
| F3-P1-F4    | 90.0(2)   | F2-P1-F5    | 90.01(18)  |
| F1-P1-F5    | 90.7(2)   | F3-P1-F5    | 89.8(2)    |
| F4-P1-F5    | 89.6(2)   | F2-P1-F6    | 89.81(18)  |
| F1-P1-F6    | 88.91(19) | F3-P1-F6    | 90.6(2)    |
| F4-P1-F6    | 90.58(19) | F5-P1-F6    | 179.6(2)   |
| C5-N1-C1    | 118.4(4)  | C5-N1-Fe1   | 113.4(3)   |
| C1-N1-Fe1   | 128.2(3)  | C5-N2-C6    | 118.3(4)   |
| C8-N3-Fe1   | 173.8(5)  | C10-N4-Fe1  | 170.9(4)   |
| C12-N5-Fe1  | 175.7(5)  | C2-C1-N1    | 122.1(5)   |
| C1-C2-C3    | 119.6(5)  | C4-C3-C2    | 119.4(5)   |
| C3-C4-C5    | 118.1(5)  | N1-C5-N2    | 114.6(4)   |
| N1-C5-C4    | 122.5(4)  | N2-C5-C4    | 123.0(5)   |
| O1-C6-N2    | 119.0(4)  | O1-C6-Fe1   | 130.7(4)   |
| N2-C6-Fe1   | 110.4(3)  | O2-C7-Fe1   | 176.9(5)   |
| N3-C8-C9    | 178.4(6)  | N4-C10-C11  | 177.1(6)   |
| N5-C12-C13  | 177.9(6)  | C2S-O1S-C3S | 108.8(8)   |
| O1S-C2S-C1S | 106.4(8)  | O1S-C3S-C4S | 106.7(9)   |

**Table S7. Anisotropic atomic displacement parameters ( $\text{\AA}^2$ ).**

The anisotropic atomic displacement factor exponent takes the form:

$$-2\pi^2[ h^2 a^{*2} U_{11} + \dots + 2 h k a^* b^* U_{12} ]$$

|     | $U_{11}$   | $U_{22}$   | $U_{33}$  | $U_{23}$    | $U_{13}$    | $U_{12}$    |
|-----|------------|------------|-----------|-------------|-------------|-------------|
| Fe1 | 0.0137(3)  | 0.0134(4)  | 0.0216(4) | 0.0017(3)   | -0.0024(3)  | -0.0002(3)  |
| P1  | 0.0183(7)  | 0.0188(7)  | 0.0316(8) | -0.0022(6)  | -0.0012(6)  | 0.0007(6)   |
| F1  | 0.054(2)   | 0.033(2)   | 0.070(3)  | 0.0161(19)  | 0.030(2)    | 0.0107(18)  |
| F2  | 0.0317(19) | 0.056(2)   | 0.057(2)  | -0.032(2)   | -0.0185(17) | 0.0154(18)  |
| F3  | 0.038(2)   | 0.051(2)   | 0.063(3)  | 0.019(2)    | 0.0094(18)  | -0.0075(18) |
| F4  | 0.040(2)   | 0.057(2)   | 0.055(2)  | -0.027(2)   | -0.0117(18) | -0.0052(19) |
| F5  | 0.0300(18) | 0.039(2)   | 0.051(2)  | -0.0099(18) | 0.0058(16)  | 0.0141(16)  |
| F6  | 0.0204(16) | 0.0245(17) | 0.061(2)  | -0.0009(17) | -0.0052(16) | 0.0056(14)  |
| O1  | 0.0140(18) | 0.0217(19) | 0.030(2)  | 0.0059(17)  | 0.0034(16)  | -0.0016(15) |
| O2  | 0.054(3)   | 0.038(3)   | 0.050(3)  | -0.013(2)   | -0.026(2)   | 0.004(2)    |
| N1  | 0.015(2)   | 0.014(2)   | 0.017(2)  | -0.0024(18) | -0.0004(17) | -0.0018(17) |
| N2  | 0.015(2)   | 0.014(2)   | 0.027(2)  | 0.0031(19)  | 0.0023(19)  | 0.0003(18)  |
| N3  | 0.021(2)   | 0.018(2)   | 0.030(3)  | 0.004(2)    | -0.001(2)   | 0.000(2)    |
| N4  | 0.014(2)   | 0.021(2)   | 0.029(3)  | 0.004(2)    | 0.0021(19)  | 0.0009(18)  |
| N5  | 0.013(2)   | 0.027(3)   | 0.032(3)  | 0.004(2)    | -0.0071(19) | 0.001(2)    |
| C1  | 0.016(3)   | 0.025(3)   | 0.024(3)  | -0.002(2)   | 0.008(2)    | 0.000(2)    |
| C2  | 0.020(3)   | 0.023(3)   | 0.024(3)  | -0.005(2)   | 0.011(2)    | -0.002(2)   |
| C3  | 0.030(3)   | 0.017(3)   | 0.029(3)  | 0.000(2)    | 0.006(2)    | -0.006(2)   |
| C4  | 0.021(3)   | 0.014(3)   | 0.031(3)  | -0.003(2)   | 0.005(2)    | -0.002(2)   |
| C5  | 0.016(2)   | 0.015(3)   | 0.018(2)  | -0.002(2)   | -0.0013(19) | -0.003(2)   |
| C6  | 0.015(2)   | 0.011(2)   | 0.021(3)  | 0.001(2)    | -0.005(2)   | -0.003(2)   |
| C7  | 0.026(3)   | 0.017(3)   | 0.035(3)  | 0.001(3)    | -0.004(3)   | 0.004(2)    |
| C8  | 0.020(3)   | 0.021(3)   | 0.037(3)  | 0.002(3)    | 0.003(2)    | 0.002(2)    |
| C9  | 0.037(2)   | 0.051(3)   | 0.063(3)  | 0.021(2)    | -0.012(2)   | -0.010(2)   |
| C10 | 0.017(3)   | 0.029(3)   | 0.023(3)  | 0.006(2)    | 0.001(2)    | -0.005(2)   |
| C11 | 0.037(2)   | 0.051(3)   | 0.063(3)  | 0.021(2)    | -0.012(2)   | -0.010(2)   |
| C12 | 0.017(3)   | 0.037(4)   | 0.041(3)  | 0.024(3)    | -0.012(3)   | -0.013(3)   |
| C13 | 0.037(2)   | 0.051(3)   | 0.063(3)  | 0.021(2)    | -0.012(2)   | -0.010(2)   |
| O1S | 0.031(4)   | 0.032(5)   | 0.034(4)  | -0.008(4)   | 0.004(3)    | 0.003(4)    |
| C1S | 0.040(6)   | 0.041(6)   | 0.045(6)  | -0.005(5)   | 0.013(5)    | 0.003(5)    |
| C2S | 0.031(5)   | 0.037(5)   | 0.029(4)  | 0.004(4)    | 0.003(4)    | 0.004(4)    |
| C3S | 0.040(5)   | 0.036(5)   | 0.035(5)  | 0.001(4)    | -0.002(4)   | 0.003(4)    |
| C4S | 0.038(6)   | 0.038(7)   | 0.047(6)  | -0.008(6)   | 0.005(5)    | -0.007(6)   |

**Table S8. Hydrogen atomic coordinates and isotropic atomic displacement parameters (Å<sup>2</sup>).**

|      | x/a      | y/b      | z/c      | U(eq)     |
|------|----------|----------|----------|-----------|
| H2N  | 0.041(4) | 0.416(8) | 0.712(3) | 0.040(18) |
| H1   | 0.3623   | 0.2457   | 0.6385   | 0.026     |
| H2   | 0.3853   | 0.4983   | 0.5858   | 0.027     |
| H3   | 0.2675   | 0.6968   | 0.5880   | 0.03      |
| H4   | 0.1294   | 0.6377   | 0.6490   | 0.026     |
| H9A  | 0.4793   | -0.2386  | 0.6429   | 0.076     |
| H9B  | 0.4808   | -0.2825  | 0.7294   | 0.076     |
| H9C  | 0.5328   | -0.1212  | 0.7014   | 0.076     |
| H11A | 0.3031   | 0.2369   | 0.9812   | 0.076     |
| H11B | 0.3756   | 0.3512   | 0.9397   | 0.076     |
| H11C | 0.3964   | 0.1593   | 0.9499   | 0.076     |
| H13A | 0.1468   | -0.4458  | 0.8509   | 0.076     |
| H13B | 0.0635   | -0.3419  | 0.8842   | 0.076     |
| H13C | 0.1666   | -0.3260  | 0.9200   | 0.076     |
| H1SA | 0.8454   | 0.6932   | 0.0545   | 0.063     |
| H1SB | 0.9515   | 0.6670   | 0.0327   | 0.063     |
| H1SC | 0.8758   | 0.7248   | -0.0289  | 0.063     |
| H2SA | 0.8601   | 0.9802   | 0.0338   | 0.039     |
| H2SB | 0.9370   | 0.9221   | 0.0952   | 0.039     |
| H3SA | 1.0251   | 1.1539   | 0.0616   | 0.045     |
| H3SB | 0.9567   | 1.2050   | -0.0069  | 0.045     |
| H4SA | 1.1103   | 1.2935   | -0.0292  | 0.062     |
| H4SB | 1.0785   | 1.1593   | -0.0897  | 0.062     |
| H4SC | 1.1466   | 1.1083   | -0.0215  | 0.062     |

**Table S9. Hydrogen bond distances (Å) and angles (°).**

|             | Donor-H | Acceptor-H | Donor-Acceptor | Angle |
|-------------|---------|------------|----------------|-------|
| N2-H2N...O1 | 0.86(6) | 2.10(6)    | 2.868(6)       | 148.0 |

**References:**

- 1 Y. Lee, D. Seomoon, S. Kim, H. Han, S. Chang, P. H. Lee, *J. Org. Chem.*, 2004, **69**, 1741-1743.
- 2 W. Adam, C. M. Mitchell, C. R. Saha-Mo1ller, O. Weichold, *J. Am. Chem. Soc.*, 1999, **121**, 2097-2103.
- 3 J. John, E. Gravel, A. Hagege, H. Li, T. Gacoin, E. Doris, *Angew. Chem. Int. Ed.*, 2011, **50**, 7533-7536.

- 4 R. A. Corbin, E. A. Ison, M. M. Abu-Omar, *Dalton Trans.*, 2009, **15**, 2850-2855.
- 5 M. Yu, H. Jing, X. Fu, *Inorg. Chem.*, 2013, **52**, 10741-10743.
- 6 M. Lee, S. Ko, S. Chang, *J. Am. Chem. Soc.*, 2000, **122**, 12011-12012
- 7 S. T. Tan, J. W. Kee, W. Y. Fan, *Organometallics*, 2011, **30**, 4008-4013
- 8 J. John, E. Gravel, A. Hagege, H. Li, T. Gacoin, E. Doris, *Angew. Chem. Int. Ed.*, 2011, **50**, 7533-7536.
- 9 N. Asao, Y. Ishikawa, N. Hatakeyama, Menggenbateer, Y. Yamamoto, M. Chen, W. Zhang, A. Inoue, *Angew. Chem. Int. Ed.*, 2010, **49**, 10093-10095.
- 10 SMART version 5.628; Bruker AXS Inc., Madison, WI, 2001.
- 11 SAINT+ version 6.22a; Bruker AXS Inc., Madison, WI, 2001.
- 12 Sheldrick, G. W. SADABS version 2.10; University of Göttingen, Göttingen, Germany, 2001.
- 13 SHELXTL version 6.14; Bruker AXS Inc., Madison, WI, 2000.
